# Supplementary material
Source: HighWire-hosted journal article supplement (https://www.rcpjournals.org/highwire/filestream/10792/field_highwire_adjunct_files/0/Steel_supplementary_material_S1_Timeline.pdf)

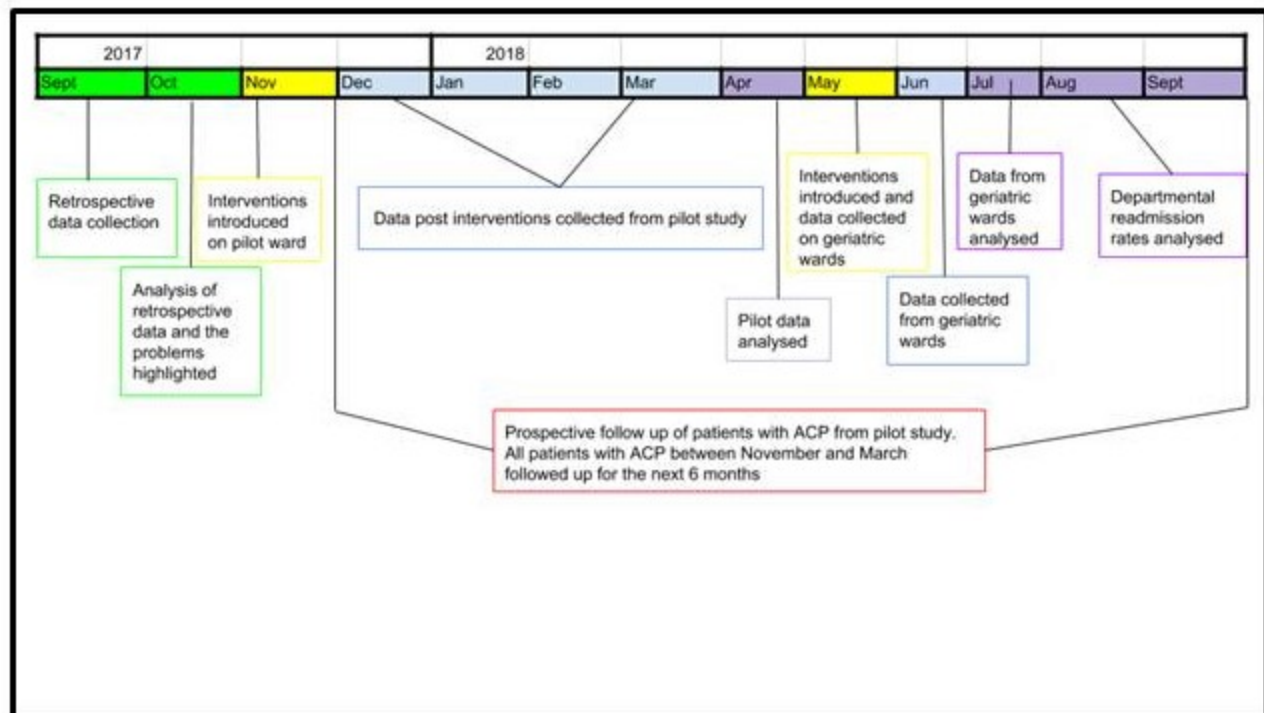

Supplement: Steel_supplementary_material_S1_Timeline.pdf [file Steel_supplementary_material_S1_Timeline.pdf]
